# Supplementary material for: Microbial Community in the Permafrost Thaw Gradient in the South of the Vitim Plateau (Buryatia, Russia)
Source: MDPI journal article supplement (doi:10.3390/microorganisms10112202), 2022-11-07
Supplement: s1 [file s1]

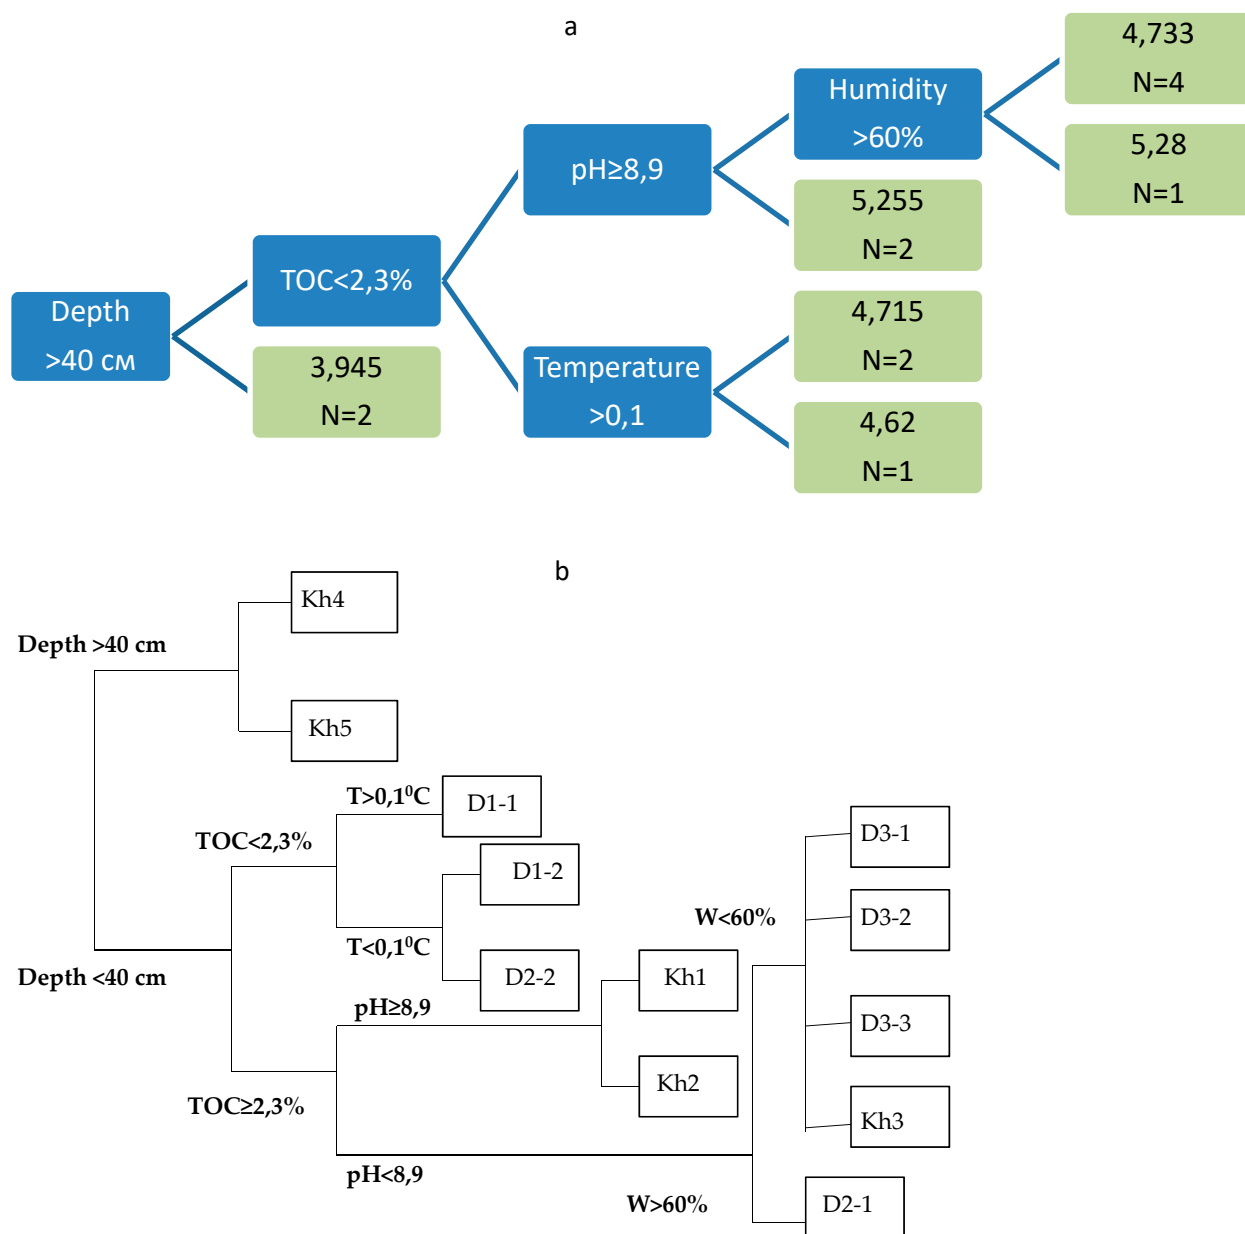

**Figure S1** Regression tree analysis for assessing the effects of each environmental variables (a) and sample sites clustering (b). TOC – total organic carbon, T – soil temperature, W – soil humidity.

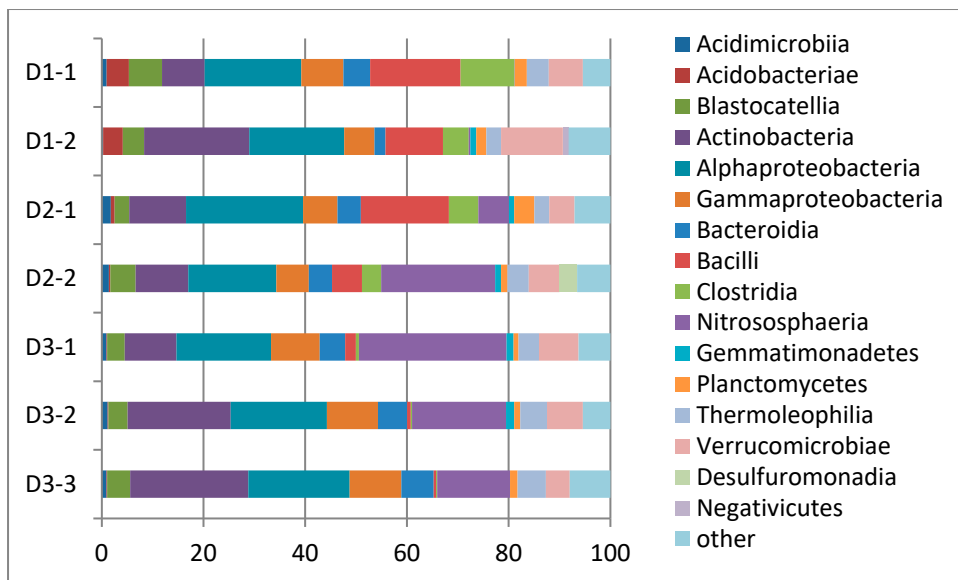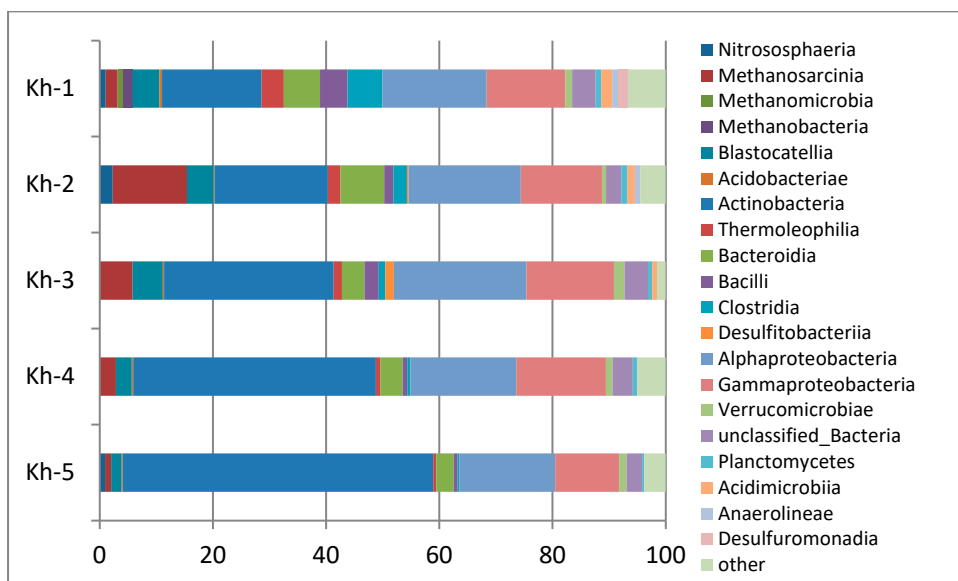

**Figure S2** Relative abundance of bacteria and archaea on the class level in permafrost soils along Darkhituy-Khaimisan transect.

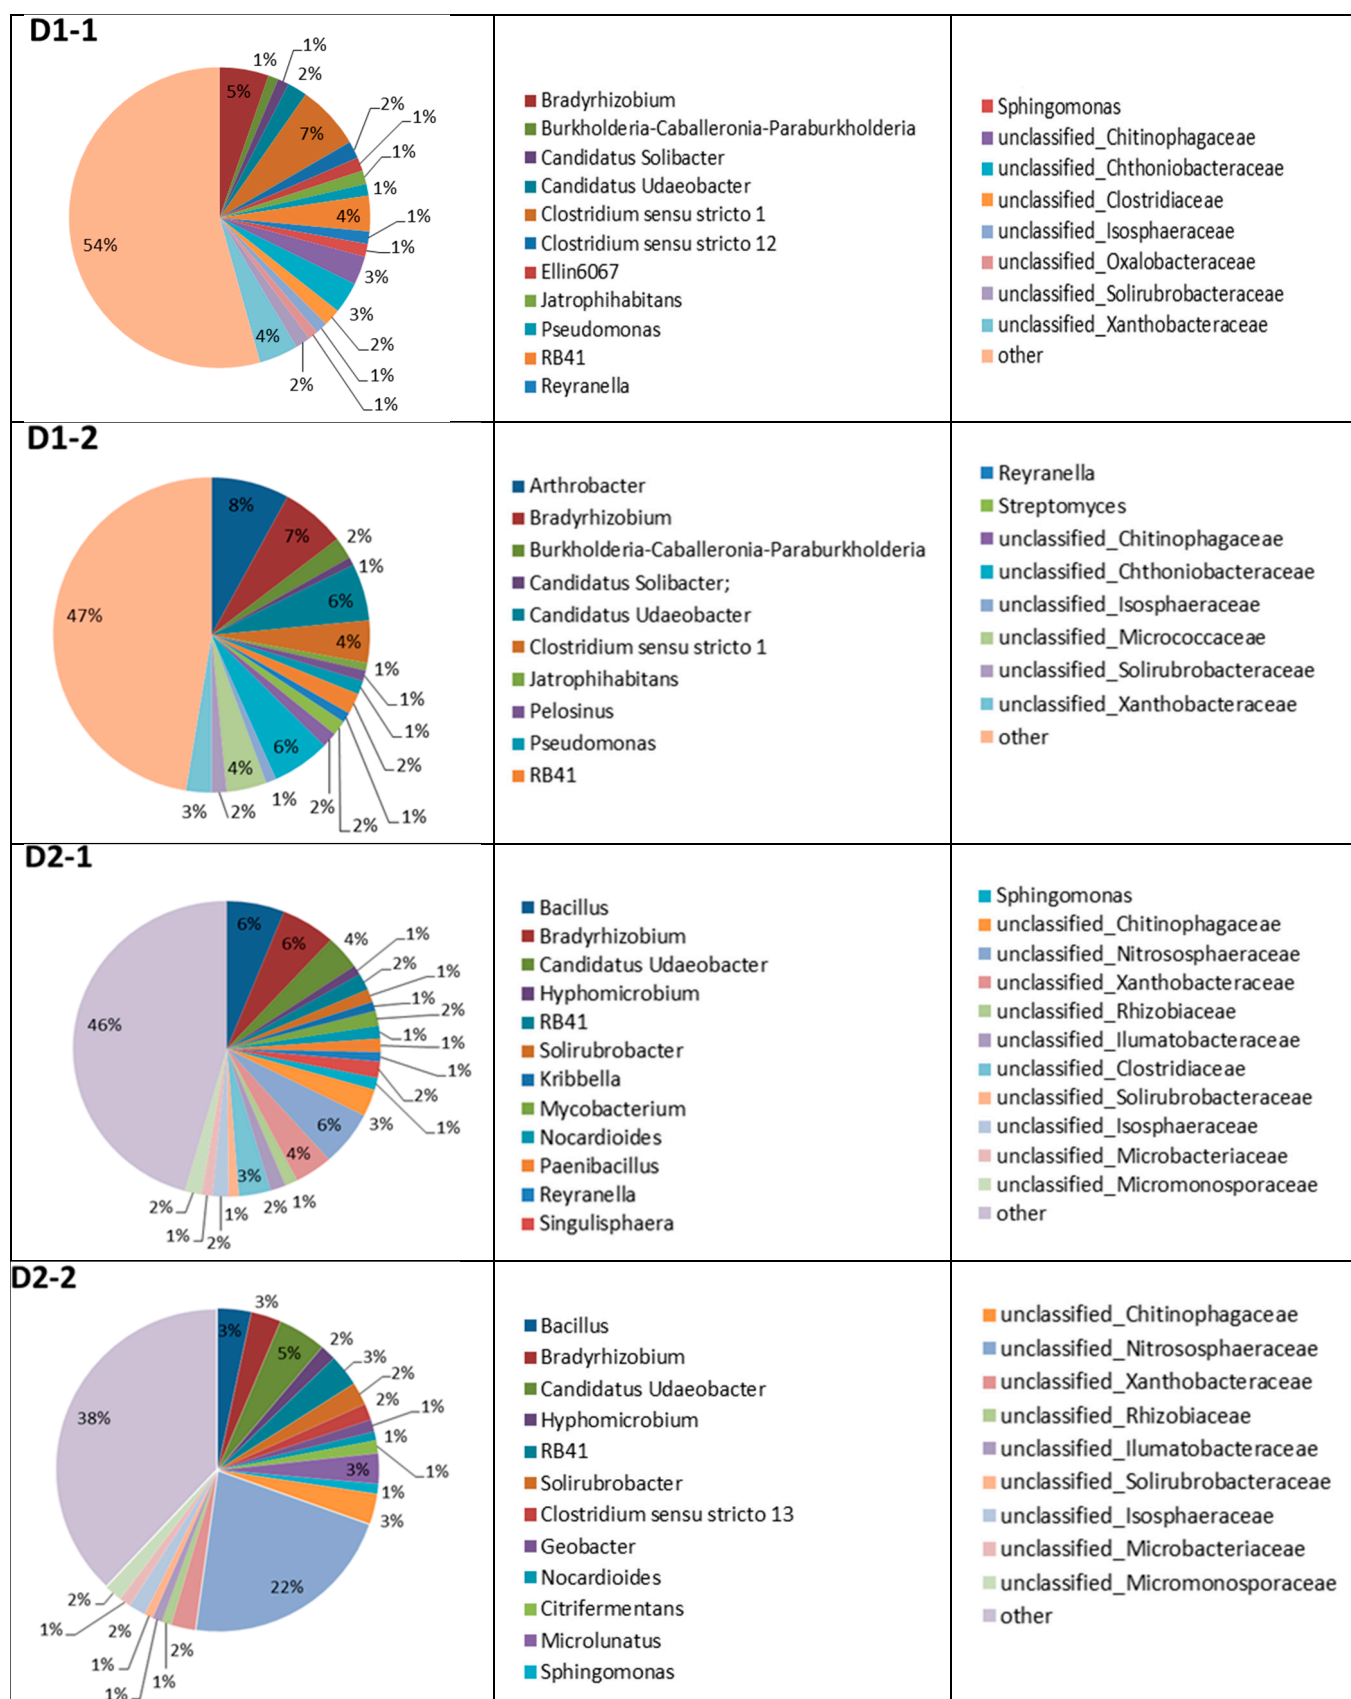

**Figure S3** Relative abundance of bacteria and archaea on the genus level in Darkhituy soils (Sites D1 and D2).

### D3-1

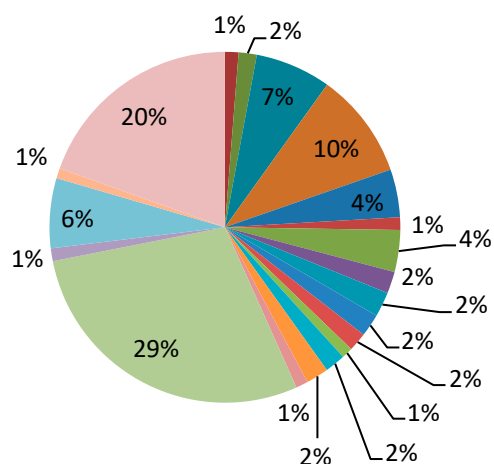

- Bacillus
- Bradyrhizobium
- Candidatus Udaeobacter
- Nocardioides
- Microlunatus
- Flavobacterium
- Hyphomicrobium
- Lysobacter
- RB41
- Solirubrobacter
- Sphingomonas
- Terrimonas
- unclassified\_Chitinophagaceae
- unclassified\_Comamonadaceae
- unclassified\_Micrococcaceae
- unclassified\_Nitrososphaeraceae
- unclassified\_Rhizobiaceae
- unclassified\_Xanthobacteraceae
- unclassified\_Solirubrobacteraceae
- other

### D3-2

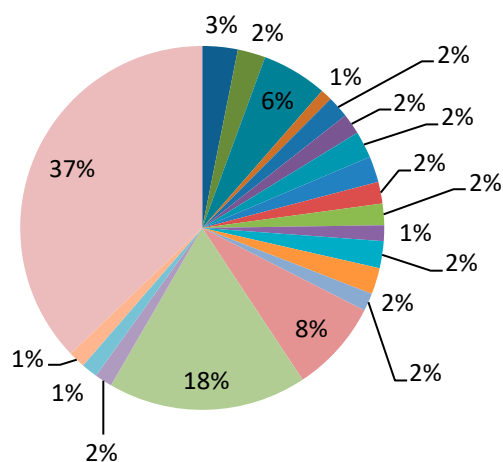

- Agromyces
- Bradyrhizobium
- Candidatus Udaeobacter
- Nocardioides
- Microlunatus
- Lysobacter
- RB41
- Solirubrobacter
- Sphingomonas
- Terrimonas
- Pseudoxanthomonas
- unclassified\_Chitinophagaceae
- unclassified\_Comamonadaceae
- unclassified\_Microbacteriaceae
- unclassified\_Micrococcaceae
- unclassified\_Nitrososphaeraceae
- unclassified\_Rhizobiaceae
- unclassified\_Xanthobacteraceae
- unclassified\_Solirubrobacteraceae
- other

### D3-3

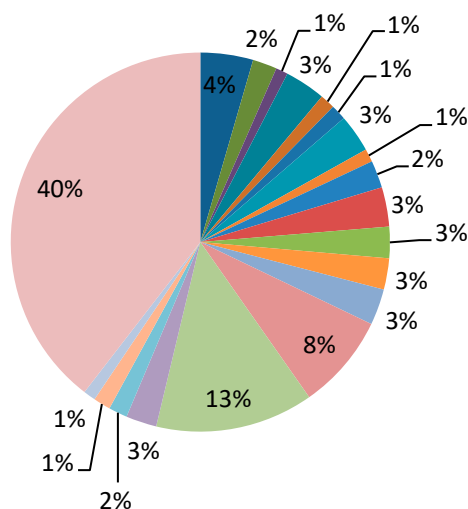

- Agromyces
- Bradyrhizobium
- Allorhizobium-Neorhizobium-Pararhizobium-Rhizobium
- Candidatus Udaeobacter
- Nocardioides
- Microlunatus
- RB41
- Cellulosimicrobium
- Solirubrobacter
- Sphingomonas
- Terrimonas
- unclassified\_Comamonadaceae
- unclassified\_Microbacteriaceae
- unclassified\_Micrococcaceae
- unclassified\_Nitrososphaeraceae
- unclassified\_Rhizobiaceae
- unclassified\_Xanthobacteraceae
- unclassified\_Solirubrobacteraceae
- unclassified\_Pirellulaceae
- other

**Figure S4** Relative abundance of bacteria and archaea on the genus level in Darkhituy soils (Site D3).

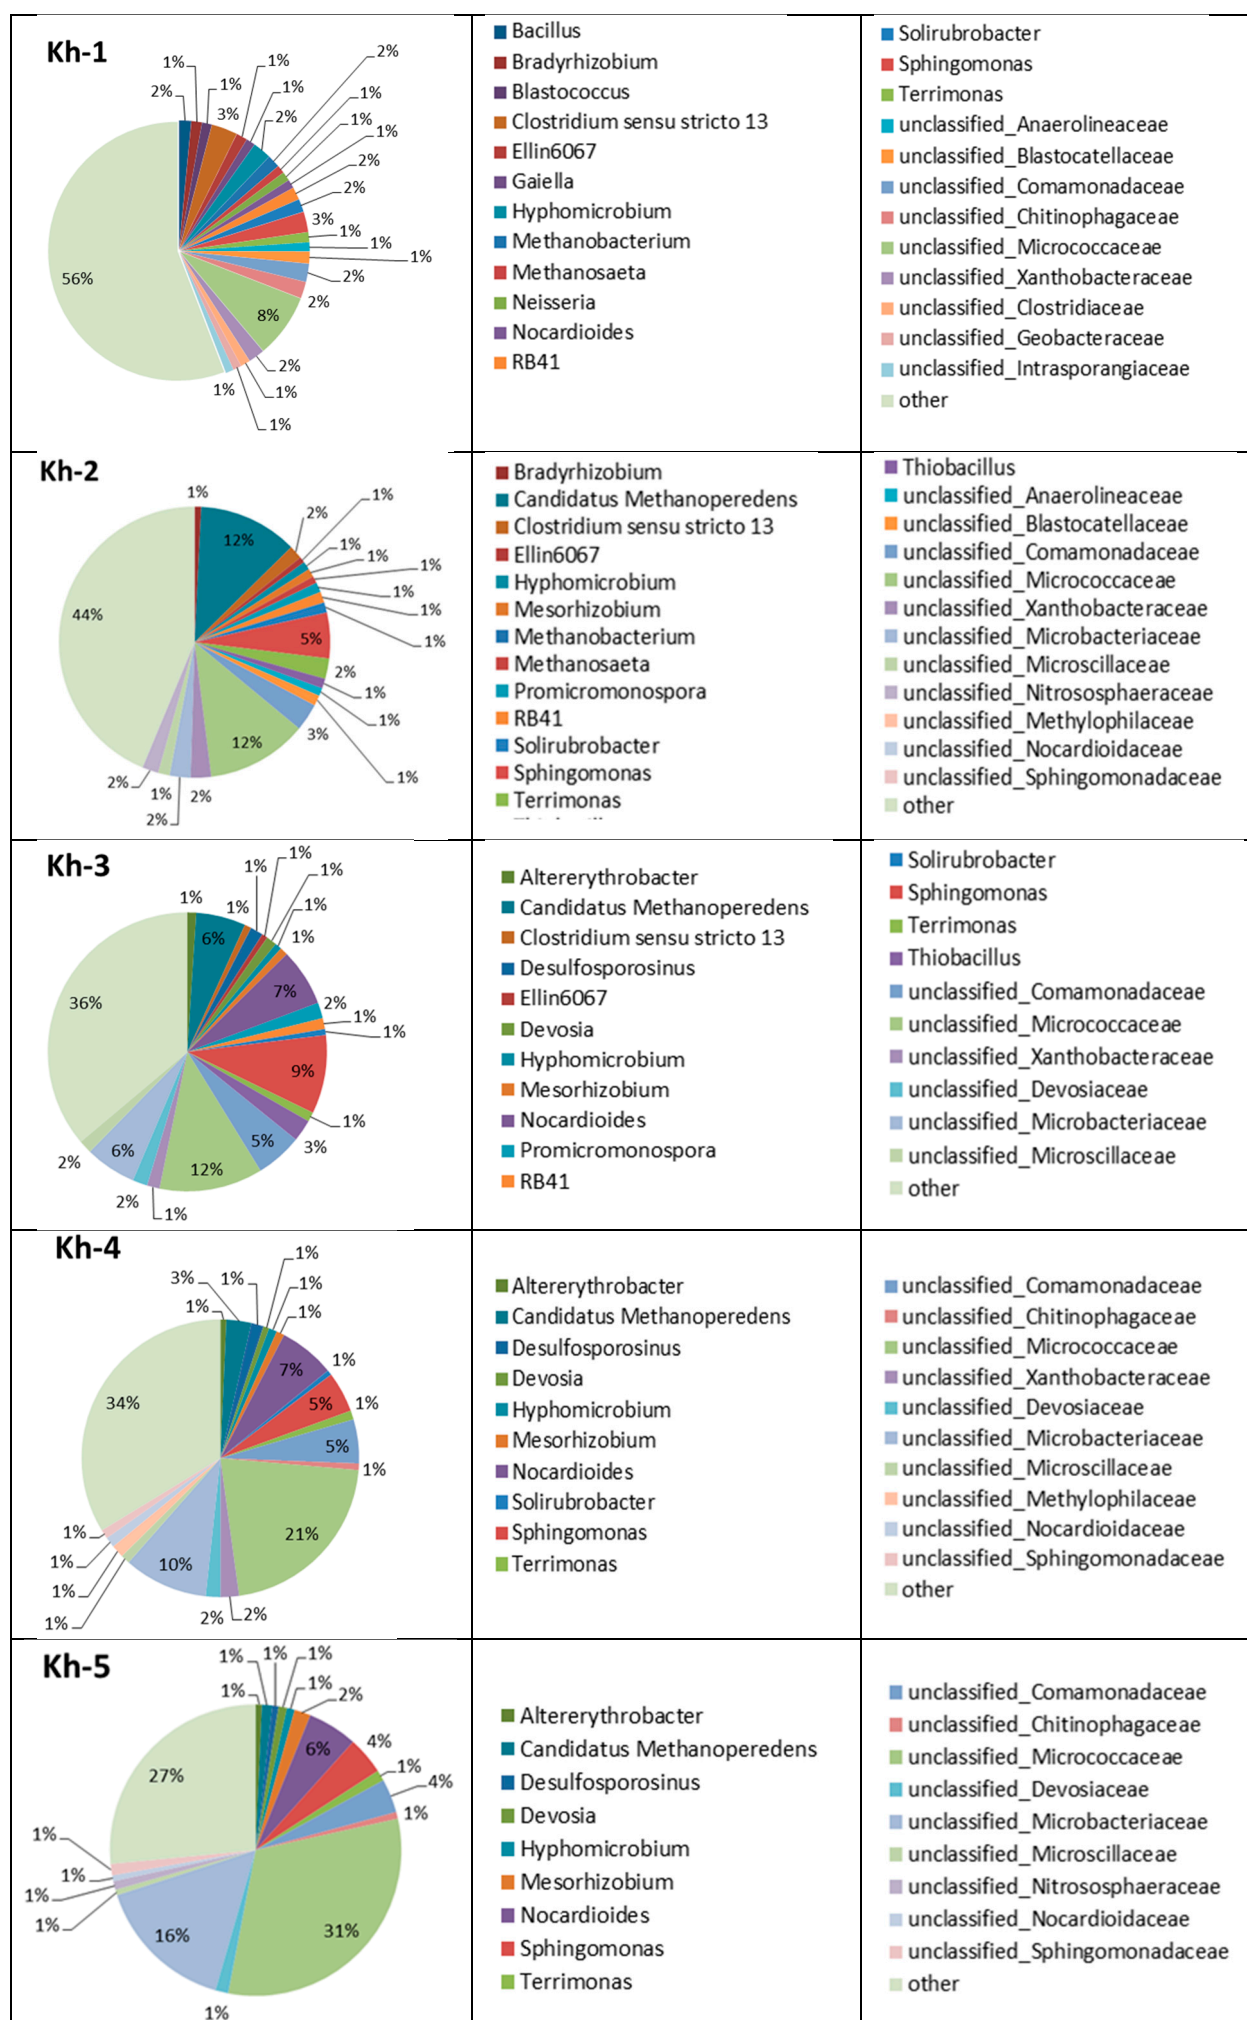

**Figure S5** Relative abundance of bacteria and archaea on the genus level in Khaimisan soil.

**Table S1** Characteristics of the samples collected from sampling sites of the Darkhituy-Khaimisan transect.

| Sampling site | Depth, cm                   | T, °C     | W, %        |
|---------------|-----------------------------|-----------|-------------|
| D1            | at the soil surface         | 6.4±0.1   | -           |
|               | 0-5                         | 1.6±0.1   | 110.46      |
|               | 5-15*                       | 0.1       | 65.86±14.64 |
|               | 17-25*; permafrost at 17 cm | -0.5      | 62.56±12.01 |
| D2            | at the soil surface         | 5.8±1.3   | -           |
|               | 0-5                         | 5.2±1.2   | 110.19      |
|               | 5-15*                       | 2.0±0.2   | 64.43±7.51  |
|               | 15-26                       | 0.2±0.008 | 70.04±1.91  |
|               | 27-37*; permafrost at 27 cm | -0.4      | 70.61±1.22  |
| D3            | at the soil surface         | 5.7±1.86  | -           |
|               | 0-5                         | 5.1±1.2   | 39.34±1.2   |
|               | 5-10*                       | 4.0±1.1   | 18.35±0.7   |
|               | 10-20*                      | 2.1±0.4   | 19.05±0.4   |
|               | 20-30*                      | 0.9±0.01  | 19.23±0.9   |
|               | 30-40; permafrost at 37 cm  | -0.1      | 19.72±0.7   |
| D4            | at the soil surface         | 14.2      | -           |
|               | 0-10*                       | 9.6±1.5   | 41.97±9.46  |
|               | 10-30*                      | 4.1±1.1   | 23.6±2.9    |
|               | 30-50*                      | 1.6±0.4   | 15.36±2.0   |
|               | 50-70*; permafrost at 67 cm | 0.2       | 32.72       |
|               | 68-75*; permafrost          | -0.2      | 22.12       |

“-“ not determined; \*samples selected for molecular genetic studies.

**Table S2** Relative abundance (%) of microbial phyla in soil community of the Darkhituy-Khaimisan transect

| Phylum                                     | D1-1  | D1-2  | D2-1  | D2-2  | D3-1   | D3-2  | D3-3  | Kh-1  | Kh-2  | Kh-3  | Kh-4  | Kh-5  |
|--------------------------------------------|-------|-------|-------|-------|--------|-------|-------|-------|-------|-------|-------|-------|
| <i>Crenarchaeota</i>                       | 0.05  | 0.32  | 6.38  | 22.42 | 29.04  | 18.48 | 14.33 | 1.06  | 2.29  | 0.07  | 0.03  | 0.94  |
| <i>Halobacterota</i>                       | 0     | 0     | 0     | 0     | 0      | 0     | 0     | 3.66  | 14.05 | 5.86  | 2.87  | 1.09  |
| <i>Euryarchaeota</i>                       | 0     | 0     | 0     | 0     | 0      | 0     | 0     | 1.61  | 0.35  | 0     | 0.15  | 0     |
| <i>Thermoplasmatota</i>                    | 0     | 0     | 0     | 0     | 0      | 0     | 0     | 0.37  | 0.19  | 0     | 0     | 0     |
| <i>Acidobacteriota</i>                     | 10.9  | 8.21  | 3.63  | 5.38  | 3.74   | 4     | 4.93  | 5.48  | 5.14  | 4.83  | 3.4   | 2.41  |
| <i>Actinobacteriota</i>                    | 12.64 | 23.59 | 16.49 | 16.6  | 16.03  | 28.36 | 30.99 | 24.16 | 23.99 | 32.46 | 44.17 | 55.64 |
| <i>Bacteroidota</i>                        | 5.27  | 2.17  | 4.6   | 4.56  | 5.03   | 5.72  | 6.37  | 6.68  | 7.74  | 4.21  | 3.88  | 3.15  |
| <i>Desulfobacterota</i>                    | 0.05  | 0.27  | 0.1   | 3.46  | 0.27   | 0.1   | 0.17  | 1.92  | 0.69  | 0.58  | 0.32  | 0.19  |
| <i>Chloroflexi</i>                         | 0     | 0.02  | 0     | 0.06  | 0.17   | 0.14  | 0.1   | 1.49  | 0.95  | 0.29  | 0.55  | 0.27  |
| <i>Firmicutes</i>                          | 29.24 | 17.53 | 23.34 | 10.15 | 2.82   | 1.17  | 0.83  | 11.79 | 4.37  | 4.3   | 2.95  | 1.87  |
| <i>Gemmatimonadota</i>                     | 1.67  | 1.18  | 1.03  | 1.16  | 1.38   | 1.61  | 1.77  | 0.36  | 0.2   | 0.26  | 0.035 | 0.036 |
| <i>Planctomycetota</i>                     | 2.38  | 1.98  | 3.98  | 1.27  | 0.97   | 1.17  | 1.48  | 1.02  | 1.12  | 0.74  | 0.77  | 0.41  |
| <i>Proteobacteria; Alphaproteobacteria</i> | 19.02 | 18.65 | 23.02 | 17.3  | 18.615 | 18.9  | 19.93 | 18.44 | 19.83 | 23.42 | 18.7  | 16.95 |
| <i>Proteobacteria; Gammaproteobacteria</i> | 8.28  | 5.95  | 6.77  | 6.4   | 9.56   | 10.04 | 10.17 | 13.94 | 14.38 | 15.49 | 15.84 | 11.3  |
| <i>Verrucomicrobiota</i>                   | 6.71  | 12.15 | 4.96  | 6.05  | 7.77   | 7.08  | 4.7   | 1.17  | 0.7   | 1.16  | 1.15  | 1.29  |
| <i>Myxococcota</i>                         | 0.19  | 0.31  | 0.69  | 0.62  | 0.07   | 0.17  | 0.001 | 1.25  | 0.29  | 0.26  | 0.14  | 0.35  |
| <i>Nitrospirota</i>                        | 0.05  | 0     | 0.02  | 0.14  | 0.07   | 0.36  | 0.5   | 0.85  | 0.63  | 0.51  | 0.84  | 1.01  |
| <i>Fibrobacterota</i>                      | 0     | 0     | 0     | 0     | 0.026  | 0.04  | 0.04  | 0.08  | 0.1   | 0.87  | 0.59  | 0.24  |
| <i>Patescibacteria</i>                     | 0     | 0     | 0     | 0.04  | 0.17   | 0     | 0     | 0.05  | 0.02  | 0.14  | 0     | 0     |
| <i>Bdellovibrionota</i>                    | 0     | 0     | 0     | 0     | 0.05   | 0     | 0     | 0.04  | 0     | 0.09  | 0     | 0     |
| <i>Campilobacterota</i>                    | 0     | 0     | 0     | 0     | 0      | 0     | 0     | 0.13  | 0     | 0     | 0     | 0     |
| <i>Fusobacteriota</i>                      | 0     | 0     | 0     | 0     | 0      | 0     | 0     | 0.1   | 0     | 0     | 0     | 0     |
| <i>Methyloirabilota</i>                    | 0     | 0     | 0     | 0     | 0      | 0     | 0     | 0.1   | 0.04  | 0     | 0     | 0     |
| unclassified_Bacteria                      | 3.54  | 5.73  | 4.65  | 4.31  | 3.99   | 2.6   | 3.39  | 4.16  | 2.68  | 4.17  | 3.61  | 2.75  |
| other                                      | 0.01  | 1.94  | 0.34  | 0.08  | 0.23   | 0.06  | 0.3   | 0.09  | 0.15  | 0.3   | 0     | 0.11  |

**Table S3** Relationships of microbial community compositions at the phylum level with environmental variables as revealed by Mantel test. Values only significant correlations presented ( $P < 0.05$ ).

| <b>Phylum</b>              | <b>Depth</b> | <b>T, °C</b> | <b>W, %</b> | <b>pH</b> |
|----------------------------|--------------|--------------|-------------|-----------|
| <i>Euryarchaeota</i>       |              | 0.754        |             |           |
| <i>Halobacterota</i>       |              |              |             | 0.433     |
| <i>Thermoplasmatota</i>    |              | 0.736        |             |           |
| <i>Actinobacteriota</i>    | 0.799        |              |             | 0.405     |
| <i>Bacteroidota</i>        |              | 0.386        |             |           |
| <i>Chloroflexi</i>         |              | 0.665        |             | 0.544     |
| <i>Firmicutes</i>          |              |              | 0.729       | 0.400     |
| <i>Fibrobacterota</i>      | 0.370        |              |             | 0.342     |
| <i>Fusobacteriota</i>      |              | 0.660        |             |           |
| <i>Gemmatimonadota</i>     | 0.376        |              |             | 0.725     |
| <i>Methyloirabilota</i>    |              | 0.594        |             | 0.366     |
| <i>Nitrospirota</i>        | 0.393        |              |             | 0.830     |
| <i>Planctomycetota</i>     |              |              | 0.451       | 0.540     |
| <i>Gammaproteobacteria</i> |              |              | 0.434       | 0.763     |
| <i>Verrucomicrobiota</i>   |              |              |             | 0.748     |
| <i>Campilobacterota</i>    |              | 0.695        |             |           |



**Table S4** Correlation matrix for microbial richness and environmental variables as revealed by Spearman Correlation analysis.

|                                              | depth  | T,°C   | W, %   | pH     | TOC    |
|----------------------------------------------|--------|--------|--------|--------|--------|
| depth                                        | 1      |        |        |        |        |
| T,°C                                         | -0,467 | 1,000  |        |        |        |
| W, %                                         | -0,301 | -0,312 | 1,000  |        |        |
| pH                                           | 0,533  | 0,422  | -0,582 | 1,000  |        |
| TOC                                          | -0,492 | 0,508  | -0,373 | -0,168 | 1,000  |
| ASVs number                                  | -0,398 | 0,735  | 0,020  | 0,313  | 0,459  |
| Shannon index                                | -0,775 | 0,584  | 0,285  | -0,130 | 0,373  |
| Simpson index                                | -0,674 | 0,553  | 0,407  | -0,121 | 0,284  |
| <i>Nitrososphaeraceae</i>                    | -0,329 | 0,073  | -0,134 | -0,328 | 0,587  |
| <i>Methanobacteriaceae</i>                   | -0,327 | 0,868  | 0,012  | 0,453  | 0,140  |
| <i>Methanocellaceae</i>                      | -0,333 | 0,859  | -0,041 | 0,515  | 0,087  |
| <i>Methanoregulaceae</i>                     | -0,314 | 0,834  | 0,057  | 0,372  | 0,180  |
| unclassified_ <i>Methanomicrobiales</i>      | -0,323 | 0,853  | 0,040  | 0,405  | 0,166  |
| <i>Methanoperedenaceae</i>                   | 0,179  | 0,125  | -0,384 | 0,592  | -0,294 |
| <i>Methanosaetaceae</i>                      | -0,305 | 0,797  | -0,108 | 0,563  | 0,021  |
| <i>Methanosarcinaceae</i>                    | -0,333 | 0,871  | 0,004  | 0,462  | 0,134  |
| unclassified_ <i>Methanosarciniales</i>      | -0,090 | 0,179  | -0,207 | 0,369  | -0,177 |
| <i>Methanomassiliicoccaceae</i>              | -0,335 | 0,872  | -0,010 | 0,480  | 0,120  |
| unclassified_ <i>Methanomassiliicoccales</i> | -0,090 | 0,179  | -0,207 | 0,369  | -0,177 |
| <i>Acidobacteriaceae</i> (Subgroup 1)        | -0,296 | -0,314 | 0,600  | -0,611 | -0,335 |
| unclassified_ <i>Acidobacteriales</i>        | -0,241 | -0,325 | 0,549  | -0,602 | -0,394 |
| <i>Solibacteraceae</i>                       | -0,389 | -0,366 | 0,779  | -0,753 | -0,297 |
| <i>Bryobacteraceae</i> ;                     | 0,868  | -0,290 | -0,220 | 0,469  | -0,267 |
| <i>Blastocatellaceae</i>                     | -0,370 | 0,818  | -0,248 | 0,538  | 0,148  |
| unclassified_ <i>Blastocatellia</i>          | 0,414  | 0,346  | -0,596 | 0,840  | -0,138 |
| <i>Pyrinomonadaceae</i>                      | -0,411 | 0,092  | 0,018  | -0,297 | 0,140  |
| <i>Vicinamibacteraceae</i>                   | 0,296  | 0,134  | -0,623 | 0,553  | -0,050 |
| <i>Thermoanaerobaculaceae</i>                | -0,125 | 0,679  | -0,162 | 0,496  | 0,045  |
| <i>Ilumatobacteraceae</i>                    | -0,329 | 0,091  | 0,588  | -0,056 | -0,166 |
| <i>Micrococcaceae</i>                        | 0,860  | -0,064 | -0,566 | 0,763  | -0,233 |
| <i>Promicromonosporaceae</i>                 | 0,161  | 0,146  | -0,655 | 0,497  | -0,097 |
| <i>Microbacteriaceae</i>                     | 0,889  | -0,307 | -0,559 | 0,530  | -0,178 |
| <i>Intrasporangiaceae</i>                    | 0,158  | 0,683  | -0,207 | 0,812  | -0,095 |
| <i>Cellulomonadaceae</i>                     | 0,610  | -0,154 | -0,166 | 0,578  | -0,315 |
| <i>Mycobacteriaceae</i>                      | -0,605 | 0,101  | 0,547  | -0,511 | 0,390  |
| <i>Nocardiaceae</i>                          | -0,314 | 0,834  | 0,057  | 0,372  | 0,180  |
| <i>Glycomycetaceae</i>                       | 0,540  | -0,144 | -0,290 | 0,435  | -0,251 |
| <i>Acidothermaceae</i>                       | -0,239 | -0,185 | 0,402  | -0,421 | -0,242 |
| <i>Frankiaceae</i>                           | -0,308 | -0,329 | 0,615  | -0,646 | -0,325 |
| <i>Geodermatophilaceae</i>                   | -0,356 | 0,858  | 0,011  | 0,476  | 0,128  |
| <i>Sporichthyaceae</i>                       | -0,197 | -0,176 | 0,315  | -0,310 | 0,256  |
| unclassified_ <i>Frankiales</i>              | -0,461 | -0,370 | 0,745  | -0,803 | -0,110 |
| <i>Kineosporiaceae</i>                       | -0,270 | -0,210 | 0,475  | -0,369 | 0,202  |
| <i>Micromonosporaceae</i>                    | -0,322 | -0,320 | 0,728  | -0,636 | 0,113  |
| <i>Nocardiodiaceae</i>                       | 0,501  | 0,063  | -0,609 | 0,424  | 0,307  |
| <i>Propionibacteriaceae</i>                  | -0,250 | -0,014 | 0,036  | -0,319 | 0,421  |
| <i>Pseudonocardiaceae</i>                    | -0,689 | 0,590  | 0,452  | -0,212 | 0,469  |
| <i>Streptomyacetaceae</i>                    | 0,112  | -0,354 | 0,267  | -0,292 | -0,384 |

|                                   |        |        |        |        |        |
|-----------------------------------|--------|--------|--------|--------|--------|
| <i>Streptosporangiaceae</i>       | -0,317 | -0,143 | 0,513  | -0,395 | 0,257  |
| <i>Thermomonosporaceae</i>        | -0,264 | -0,269 | 0,507  | -0,508 | 0,147  |
| <i>Actinomycetaceae</i>           | -0,314 | 0,834  | 0,057  | 0,372  | 0,180  |
| <i>Gaiellaceae</i>                | -0,519 | 0,606  | 0,318  | 0,028  | -0,065 |
| <i>Solirubrobacteraceae</i>       | -0,713 | 0,145  | 0,161  | -0,600 | 0,458  |
| <i>Rubrobacteriaceae</i>          | -0,347 | 0,079  | 0,031  | -0,361 | 0,605  |
| <i>Chitinophagaceae</i>           | -0,626 | 0,251  | 0,092  | -0,216 | 0,199  |
| <i>Flavobacteriaceae</i>          | -0,273 | 0,326  | -0,361 | -0,134 | 0,710  |
| <i>Weeksellaceae</i>              | -0,194 | 0,086  | -0,016 | 0,171  | -0,030 |
| <i>Crocinitomicaceae</i>          | -0,284 | 0,288  | -0,283 | -0,175 | 0,653  |
| <i>Sphingobacteriaceae</i>        | -0,112 | 0,257  | -0,415 | 0,205  | 0,359  |
| <i>Microscillaceae</i>            | 0,441  | 0,186  | -0,685 | 0,798  | -0,184 |
| <i>Spirosomaceae</i>              | -0,284 | 0,288  | -0,283 | -0,175 | 0,653  |
| <i>Hymenobacteraceae</i>          | 0,514  | -0,058 | -0,460 | 0,628  | -0,341 |
| <i>Cyclobacteriaceae</i>          | 0,834  | -0,252 | -0,329 | 0,549  | -0,313 |
| unclassified_ <i>Cytophagales</i> | -0,253 | -0,223 | 0,405  | -0,426 | 0,306  |
| <i>Prevotellaceae</i>             | -0,255 | 0,823  | 0,010  | 0,411  | 0,179  |
| <i>Porphyromonadaceae</i>         | -0,163 | 0,789  | 0,016  | 0,456  | 0,136  |
| <i>Ignavibacteriaceae</i>         | 0,238  | 0,577  | -0,164 | 0,674  | -0,042 |
| <i>Alicyclobacillaceae</i>        | -0,301 | -0,191 | 0,560  | -0,505 | -0,425 |
| <i>Bacillaceae</i>                | -0,341 | -0,033 | 0,567  | -0,346 | 0,257  |
| unclassified_ <i>Bacillales</i>   | -0,362 | -0,383 | 0,729  | -0,735 | -0,244 |
| <i>Planococcaceae</i>             | -0,493 | 0,382  | 0,209  | -0,239 | 0,660  |
| <i>Streptococcaceae</i>           | -0,196 | 0,817  | -0,054 | 0,470  | 0,165  |
| <i>Paenibacillaceae</i>           | -0,189 | -0,331 | 0,576  | -0,461 | 0,016  |
| <i>Thermoactinomycetaceae</i>     | -0,319 | -0,001 | 0,468  | -0,264 | -0,412 |
| <i>Staphylococcaceae</i>          | -0,009 | 0,709  | -0,194 | 0,558  | 0,074  |
| <i>Clostridiaceae</i>             | -0,507 | -0,017 | 0,793  | -0,504 | -0,263 |
| <i>Christensenellaceae</i>        | 0,209  | -0,015 | -0,326 | 0,293  | -0,161 |
| <i>Peptostreptococcaceae</i>      | -0,197 | -0,200 | 0,640  | -0,313 | 0,019  |
| <i>Anaerovoracaceae</i>           | 0,045  | -0,246 | 0,470  | -0,100 | -0,327 |
| <i>Lachnospiraceae</i>            | 0,072  | 0,725  | -0,114 | 0,684  | -0,001 |
| <i>Thermincolaceae</i>            | -0,263 | 0,820  | 0,040  | 0,400  | 0,167  |
| <i>Sporomusaceae</i>              | -0,190 | -0,295 | 0,621  | -0,508 | -0,484 |
| <i>Veillonellaceae</i>            | -0,221 | 0,802  | 0,044  | 0,425  | 0,148  |
| <i>Symbiobacteraceae</i>          | -0,269 | -0,231 | 0,469  | -0,512 | -0,287 |
| <i>Desulfitobacteriaceae</i>      | 0,724  | -0,123 | -0,418 | 0,626  | -0,262 |
| <i>Acetobacteraceae</i>           | -0,360 | -0,226 | 0,615  | -0,569 | -0,287 |
| <i>Inquilinaceae</i>              | -0,239 | -0,173 | 0,381  | -0,369 | 0,288  |
| <i>Azospirillaceae</i>            | -0,347 | 0,870  | -0,057 | 0,507  | 0,117  |
| <i>Caulobacteraceae</i>           | 0,142  | 0,450  | -0,435 | 0,570  | 0,287  |
| <i>Hyphomonadaceae</i>            | -0,393 | 0,730  | 0,204  | 0,211  | 0,285  |
| <i>Dongiaceae</i>                 | -0,563 | 0,578  | 0,415  | 0,044  | 0,217  |
| <i>Micropepsaceae</i>             | -0,330 | -0,368 | 0,755  | -0,627 | -0,011 |
| <i>Reyranellaceae</i>             | -0,327 | -0,436 | 0,629  | -0,801 | -0,076 |
| <i>Beijerinckiaceae</i>           | -0,625 | 0,281  | 0,466  | -0,448 | 0,044  |
| <i>Devosiaceae</i>                | 0,819  | -0,122 | -0,585 | 0,730  | -0,268 |
| <i>Hyphomicrobiaceae</i>          | -0,385 | 0,552  | -0,203 | -0,005 | 0,690  |
| <i>Rhizobiaceae</i>               | -0,128 | 0,135  | -0,482 | 0,018  | 0,563  |
| <i>Labraceae</i>                  | -0,372 | 0,017  | 0,167  | -0,423 | 0,629  |
| unclassified_ <i>Rhizobiales</i>  | 0,046  | 0,468  | -0,706 | 0,580  | 0,313  |
| <i>Xanthobacteraceae</i>          | -0,540 | -0,310 | 0,750  | -0,889 | 0,031  |

|                              |        |        |        |        |        |
|------------------------------|--------|--------|--------|--------|--------|
| <i>Rhodomicrobiaceae</i>     | -0,314 | 0,834  | 0,057  | 0,372  | 0,180  |
| <i>Sphingomonadaceae</i>     | 0,595  | 0,061  | -0,753 | 0,758  | -0,155 |
| <i>Rhodobacteraceae</i>      | -0,015 | -0,088 | -0,270 | -0,089 | 0,061  |
| <i>Burkholderiaceae</i>      | -0,204 | -0,355 | 0,621  | -0,604 | -0,361 |
| <i>Alcaligenaceae</i>        | -0,239 | -0,173 | 0,381  | -0,369 | 0,288  |
| <i>Comamonadaceae</i>        | 0,624  | 0,152  | -0,769 | 0,843  | -0,094 |
| <i>Hydrogenophilaceae</i>    | 0,320  | 0,025  | -0,447 | 0,540  | -0,280 |
| <i>Neisseriaceae</i>         | -0,253 | 0,823  | 0,020  | 0,409  | 0,180  |
| <i>Nitrosomonadaceae</i>     | -0,087 | 0,318  | 0,026  | 0,471  | -0,364 |
| <i>Oxalobacteraceae</i>      | 0,032  | -0,006 | 0,175  | 0,153  | -0,485 |
| <i>Sutterellaceae</i>        | -0,293 | 0,831  | -0,094 | 0,565  | 0,105  |
| <i>Methylophilaceae</i>      | 0,539  | -0,171 | -0,140 | 0,353  | -0,209 |
| unclassified_Burkholderiales | 0,728  | 0,024  | -0,337 | 0,787  | -0,402 |
| <i>Diplorickettsiaceae</i>   | -0,305 | -0,148 | 0,110  | -0,423 | 0,489  |
| <i>Legionellaceae</i>        | -0,185 | -0,237 | 0,372  | -0,545 | -0,146 |
| <i>Methylomonadaceae</i>     | 0,580  | -0,159 | -0,160 | 0,433  | -0,247 |
| <i>Pasteurellaceae</i>       | -0,144 | 0,788  | -0,062 | 0,478  | 0,175  |
| <i>Pseudomonadaceae</i>      | -0,407 | -0,361 | 0,470  | -0,825 | -0,119 |
| <i>Moraxellaceae</i>         | 0,086  | -0,122 | -0,285 | -0,030 | 0,026  |
| <i>Steroidobacteraceae</i>   | -0,087 | 0,381  | 0,057  | 0,192  | 0,470  |
| <i>Rhodanobacteraceae</i>    | -0,523 | 0,656  | 0,196  | 0,113  | 0,388  |
| <i>Xanthomonadaceae</i>      | -0,138 | 0,265  | -0,678 | -0,021 | 0,769  |
| unclassified_Xanthomonadales | -0,324 | -0,269 | 0,668  | -0,544 | 0,108  |
| <i>Geobacteraceae</i>        | -0,090 | 0,156  | 0,418  | 0,131  | -0,257 |
| <i>Syntrophobacteraceae</i>  | -0,314 | 0,834  | 0,057  | 0,372  | 0,180  |
| <i>Syntrophorhabdaceae</i>   | -0,314 | 0,834  | 0,057  | 0,372  | 0,180  |
| <i>Desulfocapsaceae</i>      | 0,480  | -0,030 | -0,404 | 0,657  | -0,354 |
| <i>Desulfomonilaceae</i>     | 0,517  | -0,132 | -0,308 | 0,434  | -0,250 |
| unclassified_Syntrophales    | 0,209  | -0,015 | -0,326 | 0,293  | -0,161 |
| <i>Gemmatimonadaceae</i>     | -0,610 | -0,182 | 0,259  | -0,843 | 0,332  |
| <i>Myxococcaceae</i>         | -0,339 | 0,838  | -0,224 | 0,543  | 0,129  |
| unclassified_Myxococcales    | -0,208 | 0,080  | 0,361  | -0,223 | -0,229 |
| <i>Anaeromyxobacteraceae</i> | -0,162 | 0,211  | 0,403  | 0,050  | -0,097 |
| <i>Polyangiaceae</i>         | -0,232 | 0,240  | 0,490  | 0,017  | -0,032 |
| <i>Haliangiaceae</i>         | -0,024 | 0,105  | 0,418  | 0,048  | 0,103  |
| <i>Nannocystaceae</i>        | -0,314 | 0,834  | 0,057  | 0,372  | 0,180  |
| <i>Nitrospiraceae</i>        | 0,319  | 0,561  | -0,587 | 0,898  | -0,062 |
| <i>Leptospirillaceae</i>     | 0,876  | -0,276 | -0,263 | 0,566  | -0,299 |
| <i>Gemmataceae</i>           | -0,501 | -0,240 | 0,820  | -0,703 | -0,142 |
| <i>Isosphaeraceae</i>        | -0,297 | -0,438 | 0,763  | -0,701 | -0,093 |
| <i>Pirellulaceae</i>         | -0,438 | 0,249  | -0,312 | -0,047 | 0,490  |
| <i>Rubinisphaeraceae</i>     | -0,430 | 0,711  | 0,195  | 0,241  | 0,266  |
| <i>Chthoniobacteraceae</i>   | -0,500 | -0,281 | 0,434  | -0,866 | 0,164  |
| <i>Pedosphaeraceae</i>       | -0,294 | -0,376 | 0,541  | -0,649 | -0,332 |
| <i>Opitutaceae</i>           | 0,917  | -0,228 | -0,419 | 0,704  | -0,374 |
| <i>Rubritaleaceae</i>        | 0,529  | 0,396  | -0,694 | 0,795  | 0,111  |
| <i>Verrucomicrobiaceae</i>   | -0,090 | 0,179  | -0,207 | 0,369  | -0,177 |
| <i>Ktedonobacteraceae</i>    | -0,090 | -0,258 | 0,354  | -0,386 | -0,313 |
| <i>Anaerolineaceae</i>       | 0,009  | 0,750  | -0,316 | 0,796  | -0,004 |
| <i>Caldilineaceae</i>        | -0,314 | 0,834  | 0,057  | 0,372  | 0,180  |
| <i>Saccharimonadaceae</i>    | -0,146 | 0,397  | -0,380 | 0,178  | 0,390  |
| <i>Bacteriovoraceae</i>      | -0,078 | 0,456  | -0,405 | 0,319  | 0,249  |

|                           |        |        |        |       |        |
|---------------------------|--------|--------|--------|-------|--------|
| <i>Fibrobacteraceae</i>   | 0,610  | -0,094 | -0,416 | 0,536 | -0,240 |
| <i>Fusobacteriaceae</i>   | -0,268 | 0,651  | -0,168 | 0,535 | -0,039 |
| <i>Leptotrichiaceae</i>   | -0,141 | 0,757  | 0,031  | 0,458 | 0,118  |
| <i>Campylobacteraceae</i> | -0,314 | 0,834  | 0,057  | 0,372 | 0,180  |
| <i>Methylospiraceae</i>   | -0,137 | 0,781  | -0,052 | 0,595 | 0,036  |

---
